# Supplementary material for: SARS-CoV-2 Infection in Health Care Workers of Trieste (North-Eastern Italy), 1 October 2020–7 February 2022: Occupational Risk and the Impact of the Omicron Variant
Source: MDPI journal article supplement (doi:10.3390/v14081663), 2022-07-28
Supplement: s1 [file s1]

## OCCUPATIONAL MEDICINE UNIT

### CONTACT TRACING QUESTIONNAIRE FOR SARS-CoV-2 INFECTIONS

- Name and surname
  
- Date of Birth
  
- Sex (M/F)
  
- Occupation (physician, nurse, nurse aid, health technicians, student, post-graduate medical trainees, blue collar, clerk, academic staff/ tutor)
  
- Department (Covid-19 ward, medical, surgical; accident & emergency service; radiology & other hospital services; territorial health services /health care management; administrative services; academic teaching/clinical instruction units)
  
- COVID-19 vaccination status: number of doses, date of vaccination
  
- Date of PCR test positive for SARS-CoV-2
  
- Any contact (in the previous 14 days) with:
  - 1) COVID-19 patients (yes/no); with or without protective equipment (yes/no)
  - 2) colleagues positive for SARS-CoV-2, in the workplace (yes/no )
  - 3) close friends positive for SARS-CoV-2 (yes/no )
  - 4) housemates or household members positive for SARS-CoV-2 (yes/no )
  
- COVID-19 Symptoms: no/yes (specify)
